# Supplementary material for: Ultrasonic-assisted biodiesel production from waste cooking oil over novel sulfonic functionalized carbon spheres derived from cyclodextrin via one-step: a way to produce biodiesel at short reaction time
Source: Royal Society of Chemistry journal article supplement (doi:10.1039/c5ra09499b), 2015-01-01
Supplement: c5ra09499b1.pdf [file c5ra09499b1.pdf]

## **Supplementary material**

### **Ultrasonic assisted biodiesel production from waste cooking oil over synthesis of novel sulfonic functionalized carbon spheres derived from cyclodextrin via one-step: A way to produce biodiesel at short reaction time**

Panya Maneechakr\*, Jittima Samerjit\* and Surachai Karnjanakom

*Department of Chemistry, Faculty of Science, Rangsit University, Pathumthani 12000,  
Thailand*

\*Corresponding author.

E-mail addresses: [panya.m@rsu.ac.th](mailto:panya.m@rsu.ac.th) (P. Maneechakr); [samerjit.j@gmail.com](mailto:samerjit.j@gmail.com) (J. Samerjit)

**Table S1** Properties of waste cooking oil.

| Description                               | Unit              | Value |
|-------------------------------------------|-------------------|-------|
| Free fatty acid                           | wt. %             | 19.7  |
| Water                                     | wt. %             | 0.9   |
| Unsaponifiable matter                     | wt. %             | 2.2   |
| Density@40 °C                             | kg/m <sup>3</sup> | 890   |
| Viscosity@40 °C                           | cSt               | 32.8  |
| Flash point                               | °C                | 201   |
| Color                                     | MJ/kg             | 30.3  |
| Total metal content<br>(Na, K, Ca and Mg) | ppm               | 178   |
| Fatty acid composition                    | Unit              | Value |
| Palmitic acid (C16:0)                     | wt. %             | 23.4  |
| Stearic acid (C18:0)                      | wt. %             | 8.8   |
| Oleic acid (18:1)                         | wt. %             | 53.1  |
| Linoleic acid (18:2)                      | wt. %             | 12.4  |
| Linolenic acid (18:3)                     | wt. %             | 2.3   |

**Table S2** Analysis of variance for 2<sup>4</sup> factorial design.

| Source of variation | Sum of square | Degree of freedom | Mean square | F <sub>value</sub> | F <sub>critical</sub> |
|---------------------|---------------|-------------------|-------------|--------------------|-----------------------|
| $X_1$               | 532.46        | 1                 | 532.46      | 268.65             |                       |
| $X_2$               | 1012.83       | 1                 | 1012.83     | 511.03             |                       |
| $X_3$               | 4973.78       | 1                 | 4973.78     | 2509.53            |                       |
| $X_1X_2$            | 425.39        | 1                 | 425.39      | 214.63             | 5.32                  |
| $X_1X_3$            | 112.89        | 1                 | 112.89      | 56.96              |                       |
| $X_2X_3$            | 187.01        | 1                 | 187.01      | 94.35              |                       |
| $X_1X_2X_3$         | 11.39         | 1                 | 11.39       | 5.75               |                       |
| Error               | 15.86         | 8                 | 1.98        |                    |                       |
| Total               | 7260.20       | 15                |             |                    |                       |

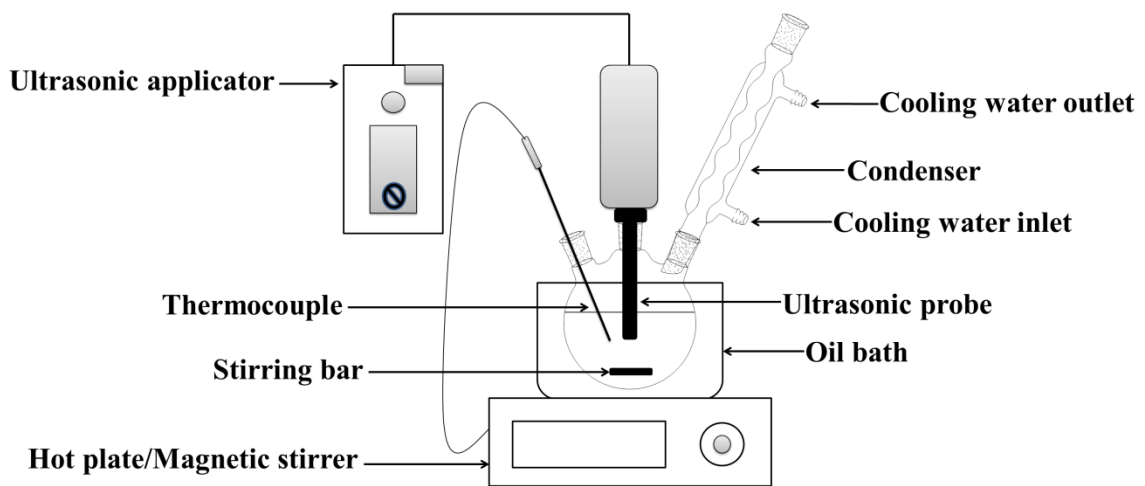

**Fig. S1.** Schematic diagram of the experimental set up for the ultrasonic assisted biodiesel production.

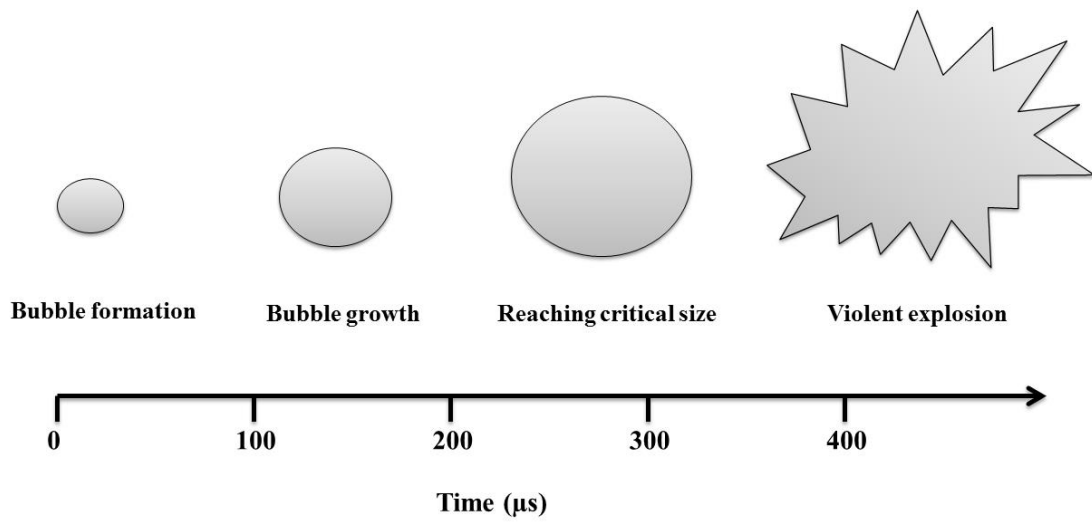

**Fig. S2.** Formation and growth of a cavitation bubble.

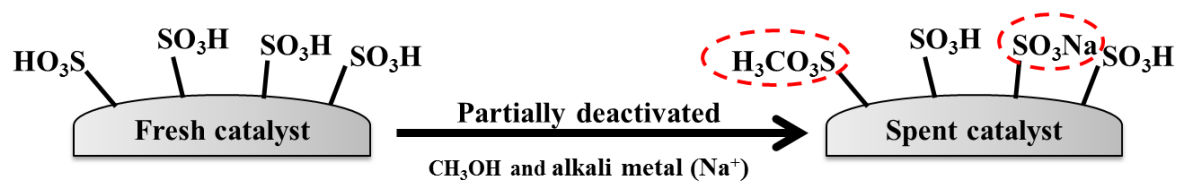

**Fig. S3.** The effects of the deactivation of active sites on catalyst.

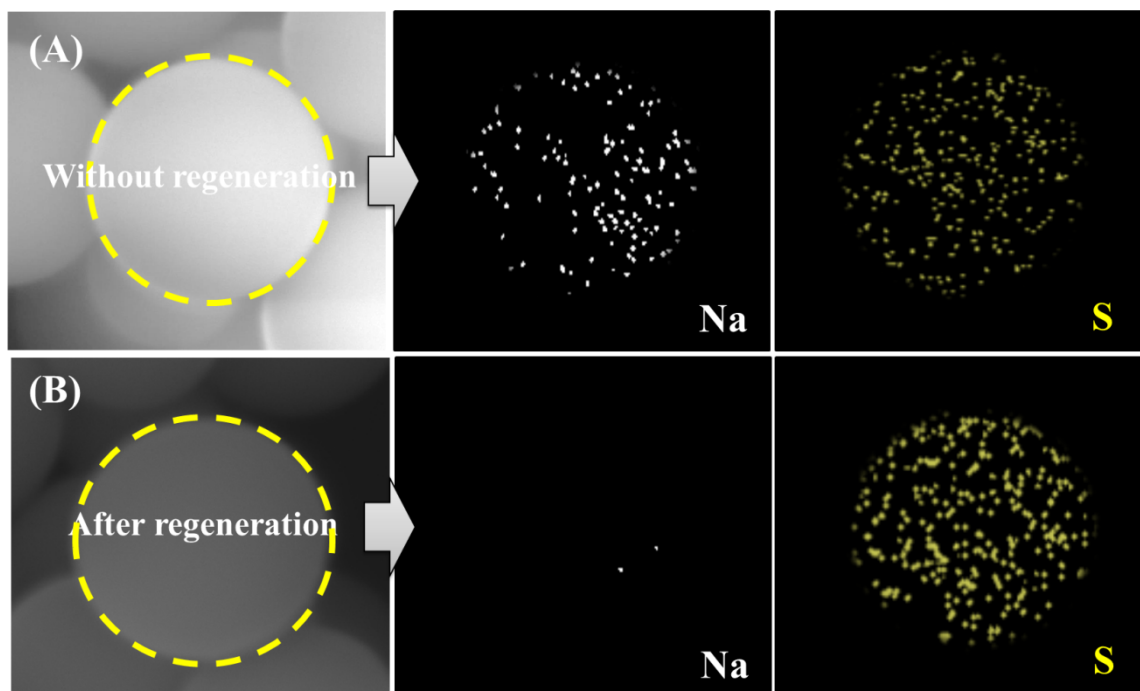

**Fig. S4.** SEM-EDS images of (A) spent catalyst without regeneration (4<sup>th</sup> reuse) and (B) spent catalyst after regeneration (4<sup>th</sup> reuse).

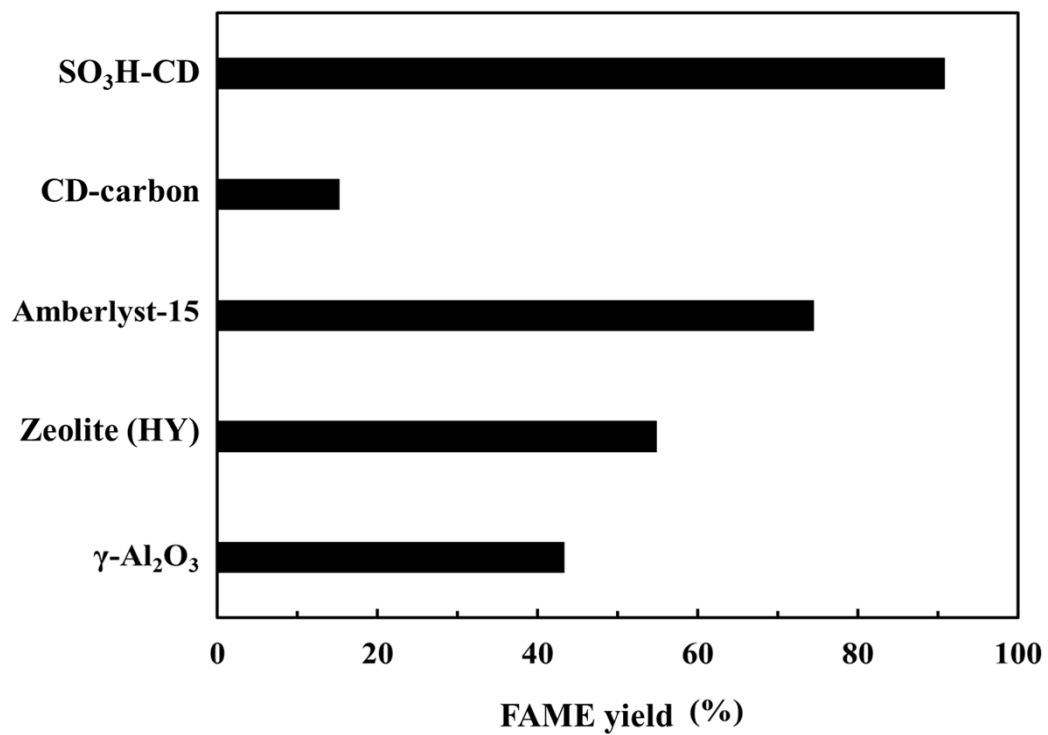

**Fig. S5.** The catalytic activity of different catalysts. Reaction condition: catalyst loading of 11.5 wt.%, reaction time of 8.8 min and reaction temperature of 117 °C.



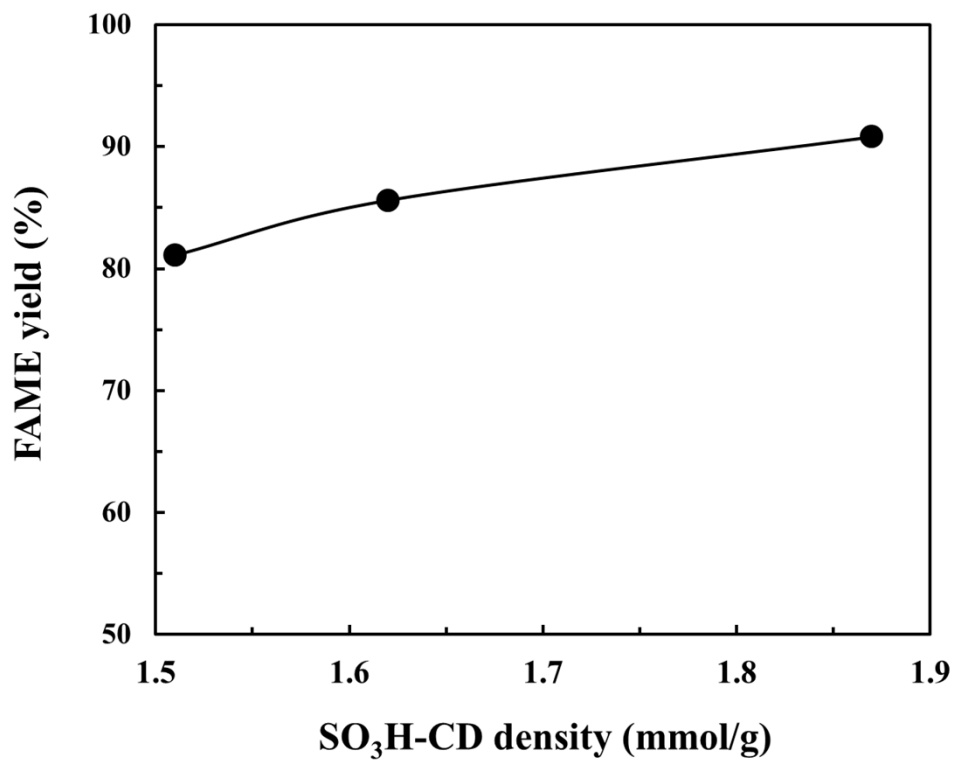

**Fig. S6.** Effect of SO<sub>3</sub>H-CD with different acid densities. Reaction condition: catalyst loading of 11.5 wt.%, reaction time of 8.8 min and reaction temperature of 117 °C.
